# Supplementary material for: COVID-19 Vaccination Intention in Patients with Autoimmune Diseases in Indonesia: An Application of the Integrated Behavioural Model
Source: MDPI journal article supplement (doi:10.3390/tropicalmed8020109), 2023-02-09
Supplement: s1 [file s1]

**Table S1.** Further analysis on items from each IBM constructs.

| Items                                                                                                                                     | $r^*$  | $\beta$ (p value) | R     | R <sup>2</sup> |
|-------------------------------------------------------------------------------------------------------------------------------------------|--------|-------------------|-------|----------------|
| <i>Instrumental attitude</i>                                                                                                              |        |                   | 0.61  | 0.373          |
| Getting vaccinated against COVID-19 is one way to end the pandemic                                                                        | 0.581  | 0.276 (<0.001)    |       |                |
| Getting vaccinated against COVID-19 will reduce the severity of being infected with the SARS-CoV-2 virus                                  | 0.409  | 0.178 (0.006)     |       |                |
| Getting vaccinated against COVID-19 means I'm contributing to herd immunity                                                               | 0.568  | 0.204 (0.008)     |       |                |
| <i>Item(s) that did not enter stepwise regression</i>                                                                                     |        |                   |       |                |
| Getting vaccinated against COVID-19 means I provide protection for my family                                                              | 0.409  |                   |       |                |
| So that the pandemic ends, I will continue to follow the health protocol after/if I have been vaccinated against COVID-19                 | 0.276  |                   |       |                |
| Getting vaccinated against COVID-19 means I'm protecting myself                                                                           | 0.469  |                   |       |                |
| If I have COVID-19, the symptoms will be more severe than for people without an autoimmune disease                                        | 0.49   |                   |       |                |
| By taking the COVID-19 vaccine, I will have immunity against COVID-19 infection                                                           | 0.54   |                   |       |                |
| <i>Experiential attitude</i>                                                                                                              |        |                   | 0.356 | 0.126          |
| I'm worried the COVID-19 vaccine will affect the medicines I'm taking                                                                     | -0.31  | -0.254 (<0.001)   |       |                |
| I'm worried about the long-term side effects of vaccination                                                                               | 0.091  | 0.138 (0.004)     |       |                |
| I'm worried about getting vaccinated against COVID-19 because it doesn't mean that good immunity is formed due to an autoimmune condition | -0.244 | -0.143 (0.008)    |       |                |
| <i>Item(s) that did not enter stepwise regression</i>                                                                                     |        |                   |       |                |

|                                                                                                                                                |       |                |       |
|------------------------------------------------------------------------------------------------------------------------------------------------|-------|----------------|-------|
| I feel worried about the side effects after the COVID-19 vaccination                                                                           | N.S.  |                |       |
| I'm worried that my autoimmune disease will get worse after the COVID-19 vaccination                                                           | N.S.  |                |       |
| <b><i>Perceived norms</i></b>                                                                                                                  |       | 0.698          | 0.487 |
| My family expects me to get vaccinated against COVID-19                                                                                        | 0.609 | 0.308 (<0.001) |       |
| I vaccinated against COVID-19 because I followed a government program                                                                          | 0.595 | 0.259 (<0.001) |       |
| I am willing to be vaccinated against COVID-19, if the doctor who treats my condition suggests it                                              | 0.483 | 0.168 (<0.001) |       |
| Having friends who advised me to get vaccinated made me intend to get vaccinated against COVID-19                                              | 0.517 | 0.124 (0.009)  |       |
| <i>Item(s) that did not enter stepwise regression</i>                                                                                          |       |                |       |
| I am not willing to be vaccinated against COVID-19 because other autoimmune patients in the same community are not vaccinated against COVID-19 | 0.434 |                |       |
| Colleagues expect me to get vaccinated against COVID-19                                                                                        | 0.502 |                |       |
| My immediate supervisor expects me to get vaccinated against COVID-19                                                                          | 0.509 |                |       |
| Religious leaders I respect expect me to get vaccinated against COVID-19                                                                       | 0.479 |                |       |
| <b><i>Perceived control</i></b>                                                                                                                |       | 0.495          | 0.245 |
| I will vaccinate against COVID-19 if I get clear information about the side effects of my autoimmune disease                                   | 0.324 | 0.187 (<0.001) |       |
| News of vaccine success rates in other countries influenced my decision to be vaccinated against COVID-19                                      | 0.469 | 0.373 (<0.001) |       |
| <i>Item(s) that did not enter stepwise regression</i>                                                                                          |       |                |       |

|                                                                                                                           |       |                |             |
|---------------------------------------------------------------------------------------------------------------------------|-------|----------------|-------------|
| I am willing to be vaccinated if I use a COVID-19 vaccine that has been scientifically proven to show a good success rate | 0.378 |                |             |
| <i>Self-efficacy</i>                                                                                                      |       |                | 0.571 0.326 |
| I have confidence that I can vaccinate against COVID-19                                                                   | 0.562 | 0.537 (<0.001) |             |
| Unclear flow and procedure to gain access to health facilities affected me in getting vaccinated against COVID-19         | 0.237 | 0.102 (0.016)  |             |
| <i>Item(s) that did not enter stepwise regression</i>                                                                     |       |                |             |
| If I want to, then it's easy for me to get vaccinated against COVID-19                                                    | 0.327 |                |             |

---

\*  $p < 0.05$  for all correlations, except N.S. (not significant).
